# Supplementary material for: Morphology regulation of Ga particles from ionic liquids and their lithium storage properties
Source: Royal Society of Chemistry journal article supplement (doi:10.1039/d0nj05491g), 2021-01-01
Supplement: d0nj05491g1.pdf [file d0nj05491g1.pdf]

## Morphology Regulation of Ga particles from Ionic Liquid and their Lithium Storage Properties

Yu Yang<sup>a</sup>, Jian Hao<sup>b</sup>, Junying Xue<sup>a</sup>, Shikun Liu<sup>a</sup>, Caixia Chi<sup>a</sup>, Jiupeng Zhao<sup>a\*</sup>,  
Yongjun Xu<sup>a</sup> and Yao Li<sup>c\*</sup>

<sup>a</sup> School of Chemistry and Chemical Engineering, Harbin Institute of Technology,  
Harbin 150001, China. E-mail: [jpzhao@hit.edu.cn](mailto:jpzhao@hit.edu.cn)

Fax: +86 45186402345;

Tel: +86 451 86403767.

<sup>b</sup> State Key Laboratory of High-efficiency Utilization of Coal and Green Chemical  
Engineering, College of Chemistry & Chemical Engineering, Ningxia University,  
Yinchuan 750021, China.

<sup>c</sup> Center for Composite Materials, Harbin Institute of Technology, Harbin 150001,  
China. E-mail: [yaoli@hit.edu.cn](mailto:yaoli@hit.edu.cn)

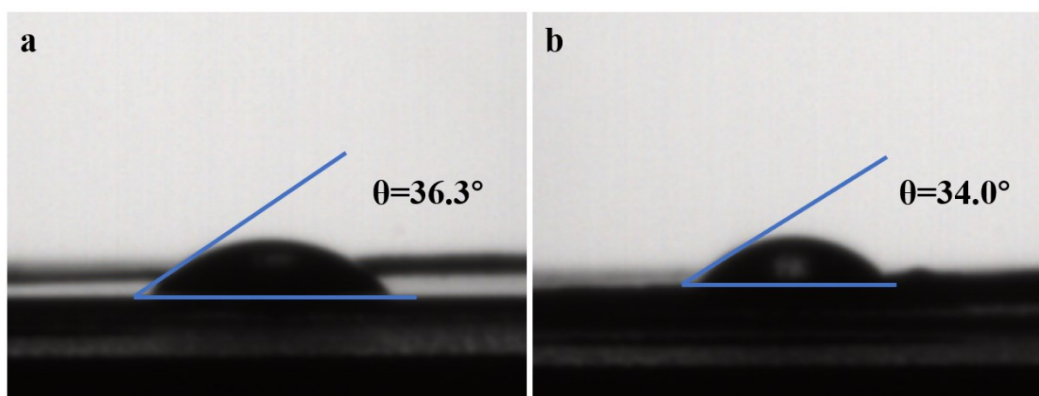

Figure S1 Contact angle between the electrolyte and Ni substrates:

(a) without  $\text{AlCl}_3$ ; (b) adding 0.75 mol/L  $\text{AlCl}_3$

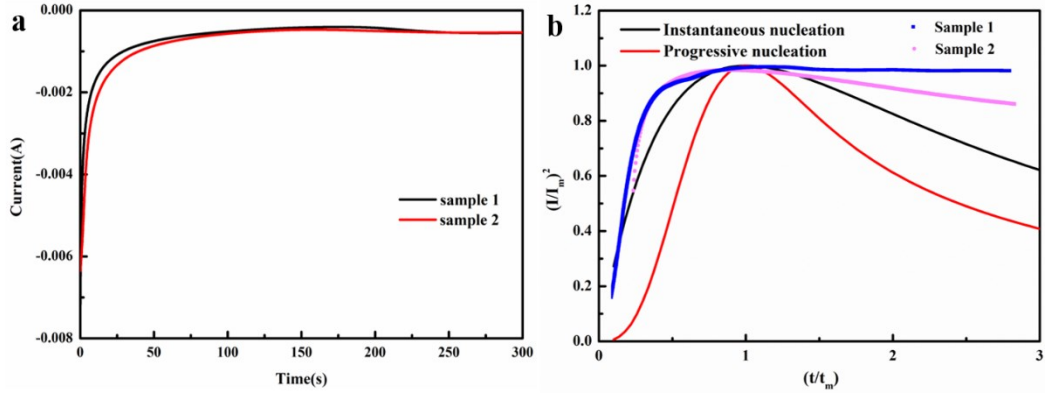

Figure S2 Ga electrodeposited from the various electrolytes: (a) I~t curves (black: sample1, red: sample 2), (b) Nondimensional relationship of  $I^2/I_m^2 \sim t/t_m$

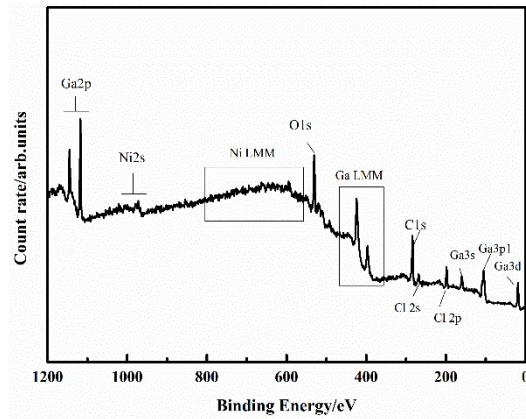

Figure S3 XPS spectrum of a gallium film on Ni substrate

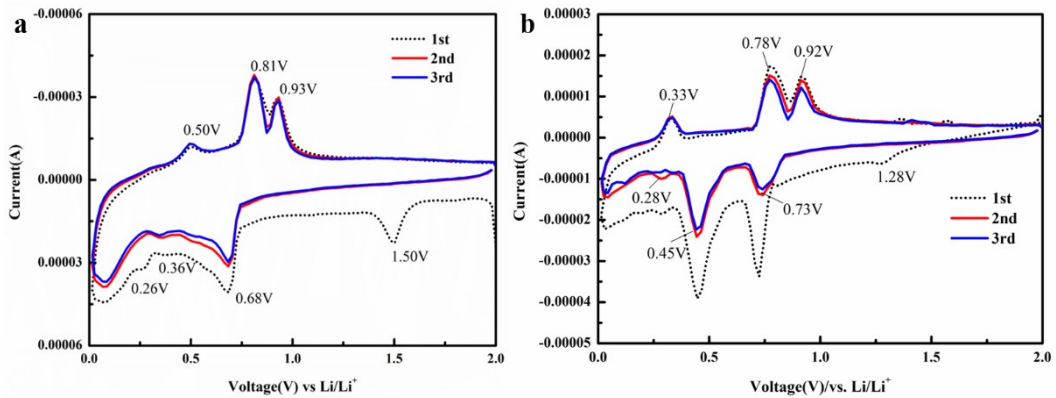

Figure S4 CV curves in Li-ion battery: (a) samples 1 and (b) sample 2

Table S1 The fitting parameters of samples

| Samples  | Rs    | CPE-1     | CPE-P   | Rct   | W1-R  | W1-T    | W1-P    |
|----------|-------|-----------|---------|-------|-------|---------|---------|
| Sample 1 | 3.804 | 3.13E-5   | 0.69235 | 112.3 | 22810 | 184     | 0.58156 |
| Sample 2 | 3.89  | 2.6451E-6 | 0.85404 | 57.74 | 213.9 | 0.33775 | 0.36782 |
